# Supplementary material for: TT2NE: a novel algorithm to predict RNA secondary structures with pseudoknots
Source: PubMed Central journal article supplement — Nucleic Acids Res. 2011 May 18;39(14):e93. doi: 10.1093/nar/gkr240 (PMC3152363; doi:10.1093/nar/gkr240), 2011-05-18
Supplement: supp_gkr240_nar-00620-met-g-2011-File003.pdf [file supp_gkr240_nar-00620-met-g-2011-File003.pdf]

To calculate the genus, one must represent base pairs as double lines. This process creates loops in the diagram.

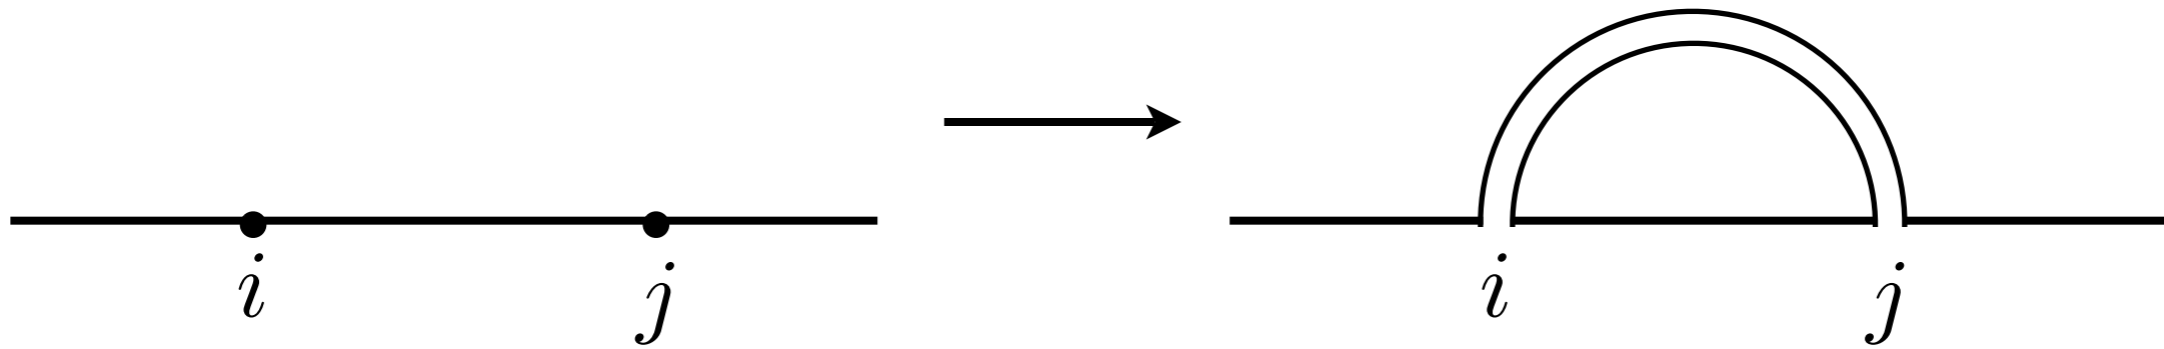

If position  $i$  and  $j$  belong to the same loop, then creating a double line between  $i$  and  $j$  results in the creation of a new loop. The diagram contains one more loop.

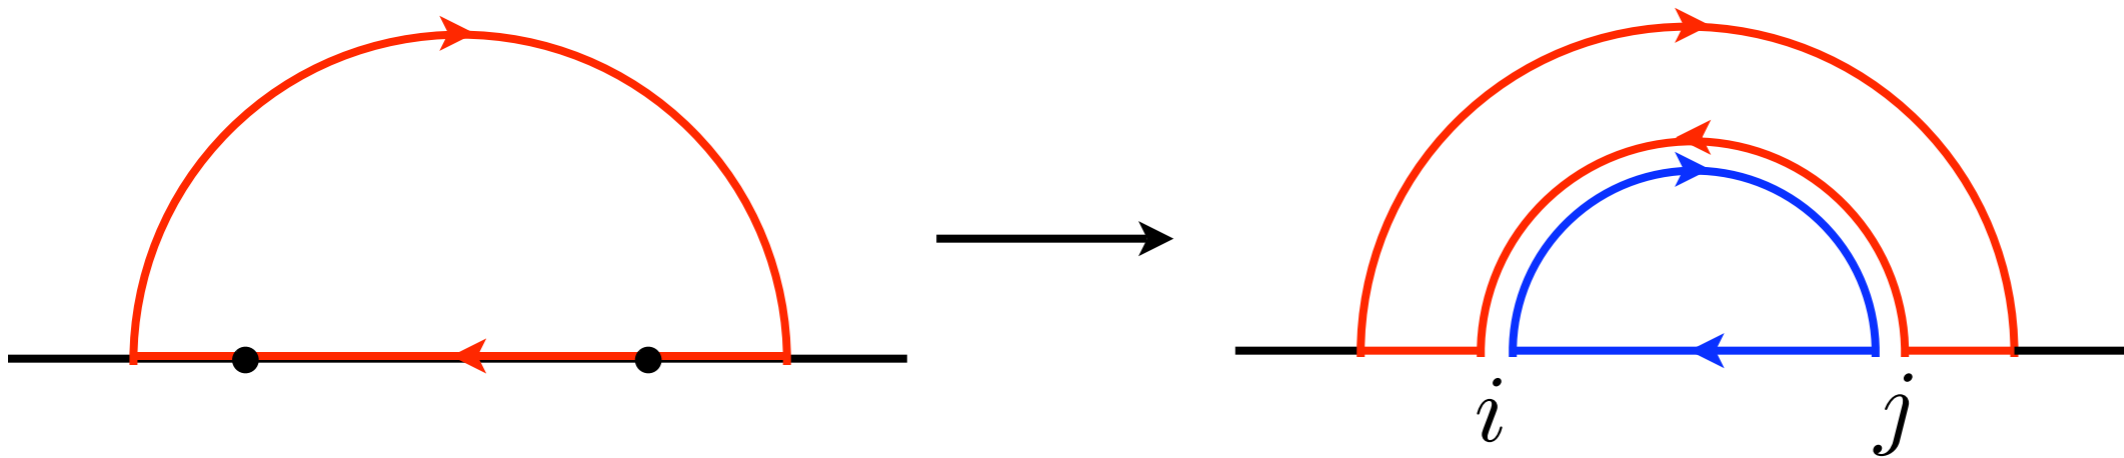

$$\Delta L = +1$$

If position  $i$  and  $j$  belong to two different loops, then we observe that creating a double line between  $i$  and  $j$  merges these two loops into one. The diagram contains one less loop.

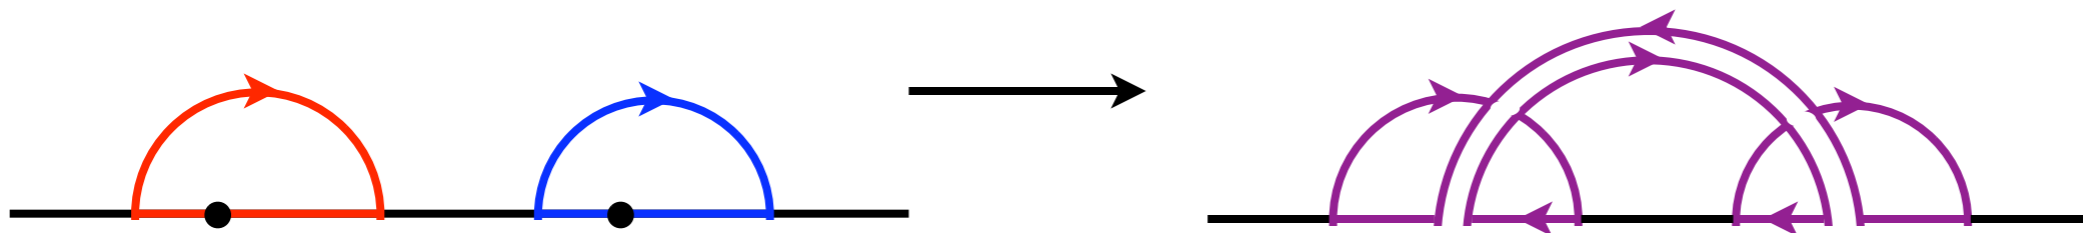

$$\Delta L = -1$$
